# Supplementary material for: Gold Nanoparticles Synthesized with Common Mullein (Verbascum thapsus) and Castor Bean (Ricinus communis) Ethanolic Extracts Displayed Antiproliferative Effects and Induced Caspase 3 Activity in Human HT29 and SW480 Cancer Cells
Source: MDPI journal article supplement (doi:10.3390/pharmaceutics14102069), 2022-09-28
Supplement: s1 [file s1]

# Supplementary Materials: Gold Nanoparticles Synthesized with Common Mullein (*Verbascum thapsus*) and Castor Bean (*Ricinus communis*) Ethanolic Extracts Displayed Antiproliferative Effects and induced Caspase 3 Activity in Human HT29 and SW480 Cancer Cells

Karen M. Soto, Ivan Luzardo-Ocampo, José M. López-Romero, Sandra Mendoza, Guadalupe Loarca-Piña and Eric M. Rivera-Muñoz and Alejandro Manzano-Ramírez

**Table S1.** Individual phenolic compounds' composition by HPLC-DAD or ME and CE extracts.

| Compound                                           | Retention time<br>(min) | Concentration<br>(μg equivalents compound/g DW) |                            |
|----------------------------------------------------|-------------------------|-------------------------------------------------|----------------------------|
|                                                    |                         | Common mullein<br>(ME)                          | Castor bean (CE)           |
| Hydroxybenzoic acids derivatives and benzaldehydes |                         |                                                 |                            |
| Gallic acid                                        | 1.80                    | 28.57 ± 0.19 <sup>a</sup>                       | 8.42 ± 0.32 <sup>b</sup>   |
| Hydroxyphenylacetic acid                           | 9.80                    | 15.78 ± 0.11 <sup>a</sup>                       | 16.14 ± 0.07 <sup>a</sup>  |
| Hydroxybenzoic acid                                | 12.33                   | 0.87 ± 0.01 <sup>b</sup>                        | 3.33 ± 0.09 <sup>a</sup>   |
| Hydroxycinnamic acids and derivatives              |                         |                                                 |                            |
| Caffeic acid                                       | 2.80                    | 3.32 ± 0.04 <sup>b</sup>                        | 37.48 ± 0.13 <sup>a</sup>  |
| <i>p</i> -Coumaric acid                            | 4.40                    | 79.93 ± 0.13 <sup>a</sup>                       | 71.88 ± 0.11 <sup>b</sup>  |
| Ferulic acid                                       | 5.30                    | 19.07 ± 0.08 <sup>b</sup>                       | 310.71 ± 0.39 <sup>a</sup> |
| Sinapic acid                                       | 5.10                    | 12.23 ± 0.06 <sup>b</sup>                       | 19.14 ± 0.91 <sup>a</sup>  |
| Flavonols                                          |                         |                                                 |                            |
| Rutin                                              | 3.30                    | 13.31 ± 0.62 <sup>a</sup>                       | 8.14 ± 0.13 <sup>b</sup>   |
| Quercetin                                          | 13.30                   | 1.44 ± 0.07 <sup>b</sup>                        | 5.71 ± 0.05 <sup>a</sup>   |
| Flavones                                           |                         |                                                 |                            |
| (+)-Catechin                                       | 2.20                    | 20.62 ± 0.23 <sup>a</sup>                       | 12.68 ± 0.35 <sup>b</sup>  |
| Epicatechin                                        | 11.55                   | 3.32 ± 0.01 <sup>b</sup>                        | 15.22 ± 0.41 <sup>a</sup>  |
| Epigallocatechin gallate                           | 11.79                   | 5.22 ± 0.91 <sup>b</sup>                        | 87.85 ± 0.17 <sup>a</sup>  |
| Hydrolyzable tannins                               |                         |                                                 |                            |
| Ellagic acid                                       | 3.80                    | 0.60 ± 0.02 <sup>b</sup>                        | 10.59 ± 0.10 <sup>a</sup>  |

The results are the mean  $\pm$  SD of three independent experiments in triplicate. Different letters (a, b) by row indicate significant differences ( $p < 0.05$ ) by Tukey-Kramer's test between treatments (ME and CE). CE: Castor bean (*Ricinus communis*) leaves ethanolic extract; DW: Dry weight; ME: Common mullein (*V. thapsus*) flowers ethanolic extract.

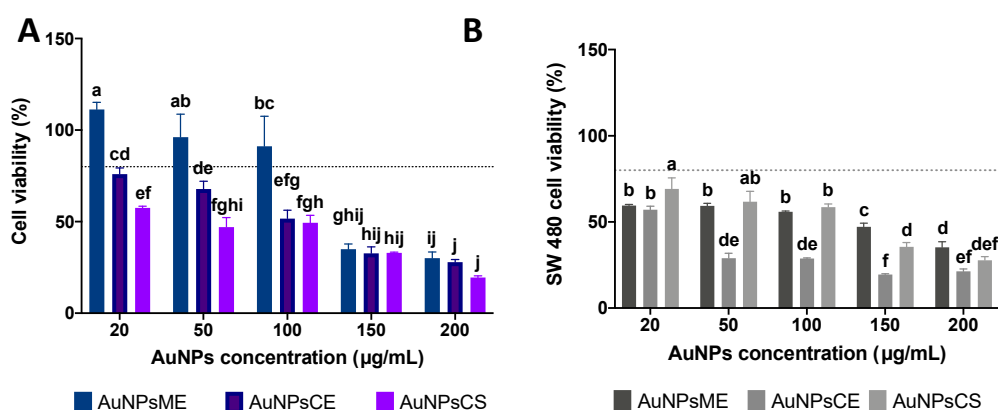

**Figure S1.** Impact of AuNPs on HT29 (A) and SW480 (B) cells viability. Different letters in (A) and (B) (a, b, c, d, e, f, g, h, i, and j) express significant differences ( $p < 0.05$ ) by Tukey-Kramer's test. The dashed line indicates 80% viability. AuNPsCE: Gold nanoparticles synthesized with castor bean (*Ricinus communis*) leaves extract; AuNPsCS: Gold nanoparticles produced by chemical synthesis; AuNPsME: Gold nanoparticles synthesized with common mullein (*V. thapsus*) flowers ethanolic extract.

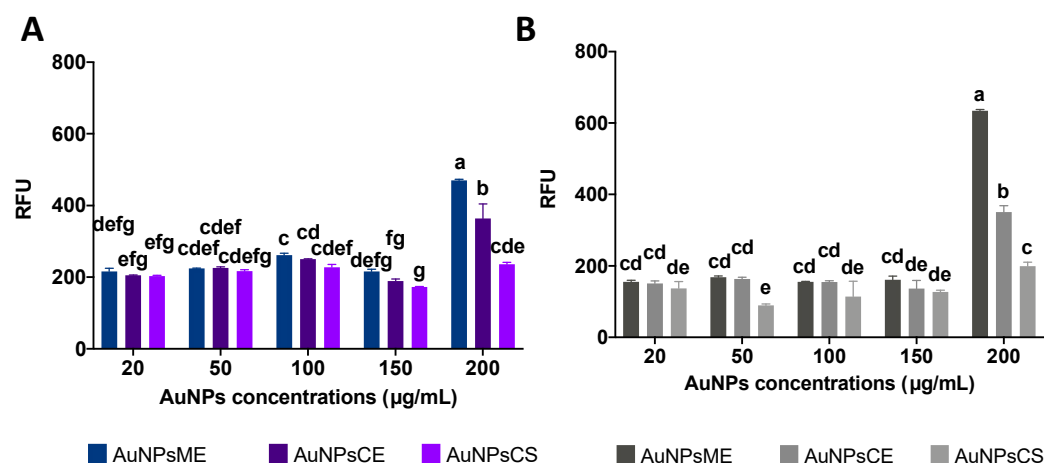

**Figure S2.** Effect of AuNPs on HT29 (A) and SW480 (B) ROS generation. Different letters in A and B (a, b, c, d, e, f, and g) express significant differences ( $p < 0.05$ ) by Tukey-Kramer's test. AuNPsCE: Gold nanoparticles synthesized with castor bean (*Ricinus communis*) leaves extract; AuNPsCS: Gold nanoparticles produced by chemical synthesis; AuNPsME: Gold nanoparticles synthesized with common mullein (*V. thapsus*) flowers ethanolic extract; RFU: Relative fluorescence units.

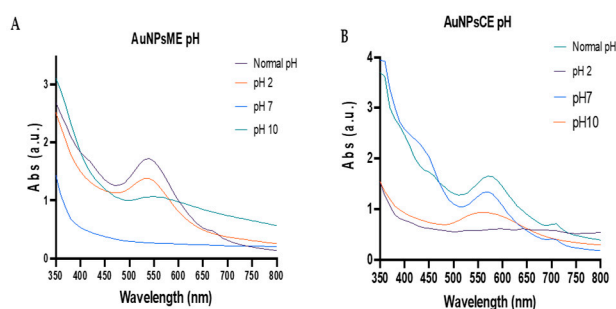

**Figure S3.** UV-Vis spectra of the effect of pH in the synthesis of AuNPs.
